# Supplementary material for: Development and Evaluation of a Reusable Self-Healing Phantom for Ultrasound-Guided Femoral Vascular Access
Source: Research Square preprint supplement (doi:10.21203/rs.3.rs-7745042/v1), 2025-11-17
Supplement: Supplementary file 1 [file SDC 2 - Evaluation Questionnaire.pdf › Supplementary_information/SDC 2 - Evaluation Questionnaire.pdf]

# Ultrasound-Guided Femoral Vascular Access Phantom

Please indicate your proficiency level in Ultrasound-Guided Vascular Puncture by selecting the appropriate option below:

- ☐ 1 – Novice.
- ☐ 2 – Beginner.
- ☐ 3 – Intermediate.
- ☐ 4 – Advanced.
- ☐ 5 – Expert.

Optional Comments:

Has this phantom made you feel more confident about ultrasound-guided femoral vascular access?

- ☐ 1 – Strongly Disagree.
- ☐ 2 – Disagree.
- ☐ 3 – Neutral.
- ☐ 4 – Agree.
- ☐ 5 – Strongly Agree.

Optional Comments:

Has this phantom improved your manual dexterity in performing ultrasound-guided femoral vascular access?

- ☐ 1 – Strongly Disagree.
- ☐ 2 – Disagree.
- ☐ 3 – Neutral.
- ☐ 4 – Agree.
- ☐ 5 – Strongly Agree.

Optional Comments:

The tactile feel of the phantom has helped to improve my skill at needle puncture.

- ☐ 1 – Strongly Disagree.
- ☐ 2 – Disagree.
- ☐ 3 – Neutral.
- ☐ 4 – Agree.
- ☐ 5 – Strongly Agree.

Optional Comments:

If you were training for ultrasound-guided femoral vascular access, would you want to use this phantom for practice?

- ☐ 1 – Strongly Disagree.
- ☐ 2 – Disagree.
- ☐ 3 – Neutral.
- ☐ 4 – Agree.
- ☐ 5 – Strongly Agree.

Optional Comments:

Up to what level of training would you use this phantom?

- ☐ Never.
- ☐ Only before training on patients.
- ☐ Before and while training on patients.
- ☐ Only while training on patients.
- ☐ All levels.

Optional Comments:

How much would you be willing to pay for this phantom?

- ☐ Under £100
- ☐ £100-500
- ☐ £500-1000
- ☐ £1000-2500
- ☐ Over £2500
